# Supplementary material for: High Diffusion Permeability of Anion-Exchange Membranes for Ammonium Chloride: Experiment and Modeling
Source: MDPI journal article supplement (doi:10.3390/ijms23105782), 2022-05-21
Supplement: s1 [file s1]

# High Diffusion Permeability of Anion Exchange Membranes for Ammonium Chloride: Experiment and Modeling

Ekaterina Skolotneva, Ksenia Tsygurina, Semyon Mareev, Ekaterina Melnikova, Natalia Pismenskaya and Victor Nikonenko\*

Membrane Institute, Kuban State University, 149 Stavropolskaya st., 350040 Krasnodar, Russia; mareev-semyon@bk.ru (S.M.); kseniya\_alx@mail.ru (K. T.); ek.skolotneva@gmail.com (E.S.); n\_pismen@mail.ru (N. P.)

\* Correspondence: v\_nikonenko@mail.ru; Tel.: +7-918-414-5816

## Supplementary materials

### *Determination of input parameters*

The diffusion boundary layer thickness in the experimental cell is calculated using the Leveque equation [1]

$$\delta = 1.02 \left( \frac{LDh}{\bar{V}} \right)^{1/3} \quad (S1)$$

here  $L$  is the channel length,  $D$  is the electrolyte diffusion coefficient,  $h$  is the distance between the studied membrane and the cell wall,  $\bar{V}$  is the linear flow velocity.

**Reaction rate constants.** According to Simons [2], the rate constants  $k_{-1}$  and  $k_{-2}$  of recombination reactions (9) and (10) (such numbering hereinafter refers to the equations from the main text of the article) free solution have high values of the order of  $10^{10} \text{ dm}^3 \text{ mol}^{-1} \text{ s}^{-1}$ . The rate constants  $k_1$  and  $k_2$  of direct reactions (9) and (10) (considered as pseudomonomolecular) can be estimated using the following relations [23]:

$$k_1 = k_{-1} 10^{-(14-pK_a)}, \quad k_2 = k_{-2} 10^{-pK_a} \quad (S2)$$

The calculation using equation (S2) gives  $k_1 \approx 10^6 \text{ s}^{-1}$ ,  $k_2 \approx 10 \text{ s}^{-1}$ . Thus, the rate limiting stage of protonation-deprotonation reactions (9) and (10) is the  $\text{NH}_4^+$  deprotonation reaction. However, the value of the rate constant of this reaction ( $k_2$ ) is quite high. It is almost 6 orders of magnitude higher than the rate constant of water dissociation in free solution ( $2 \times 10^{-5} \text{ s}^{-1}$ ), 4 orders of magnitude higher than in the case of sulfonic groups,  $3 \times 10^{-3} \text{ s}^{-1}$  [3] (the CMX membrane) and 2 orders of magnitude higher than in the case of secondary and tertiary amino groups,  $10^{-1} \text{ s}^{-1}$  [3] (the AMX membrane). Thus,  $\text{NH}_4^+/\text{NH}_3$  couple may be considered as a catalyst for the reaction of  $\text{H}^+$  and  $\text{OH}^-$  ions generation. The latter is important for electrodialysis of ammonium-containing solutions, where water splitting reactions are of great impact.

**Diffusion coefficients.** The model assumes that the membrane is a quasi-homogeneous medium. The diffusion coefficients may be estimated from the equation system, describing the conductivity,  $\kappa$ , and differential diffusion permeability,  $\bar{P}$ , of the membrane [4]:

$$\bar{P} = \bar{t}_1 \left( 1 - \frac{z_2}{z_1} \right) \frac{\bar{D}_2 \bar{c}_2}{c_2} \quad (S3)$$

$$\kappa = \frac{F^2}{RT} (z_1^2 \bar{D}_1 \bar{c}_1 + z_2^2 \bar{D}_2 \bar{c}_2) \quad (S4)$$

$$\bar{t}_i = \frac{z_i^2 \bar{D}_i \bar{c}_i}{z_1^2 \bar{D}_1 \bar{c}_1 + z_2^2 \bar{D}_2 \bar{c}_2} \quad (S5)$$

where subscript 1 and 2 refer to the counterion and coion, respectively,  $\bar{t}_i$  is the transport number of ion  $i$  in the membrane.

Since  $\bar{t}_1$  is close to 1, it can be seen from Equation (S3) that  $\bar{P}$  is mainly determined by the product  $\bar{D}_2 \bar{c}_2$  at a given concentration of the external solution,  $c_2$ . As  $\bar{D}_2 \bar{c}_2 \ll \bar{D}_1 \bar{c}_1$ , the membrane conductivity is controlled by the product  $\bar{D}_1 \bar{c}_1$ , Equation (S4). At a given concentration of the external solution and known values of  $\kappa$  and  $\bar{P}$ , it is possible to calculate  $\bar{D}_1$  and  $\bar{D}_2$ :

$$\bar{D}_2 = \frac{c_2 \bar{P}}{\bar{t}_1 \bar{c}_2 (1 - z_2 / z_1)} \quad (S6)$$

$$\bar{D}_1 = \frac{\kappa RT / F^2 - z_2^2 \bar{D}_2 \bar{c}_2}{z_1 Q - z_1 z_2 \bar{c}_2} \quad (S7)$$

the Donnan constant,  $K_D$ , is needed to relate the coion concentrations in the solution and membrane; in its approximate form, the Donnan equation reads [4,5]:  $\bar{c}_2 = \frac{K_D}{Q} c_2^2$ ;  $\bar{c}_1$

can be found using the local electroneutrality condition ( $z_1 \bar{c}_1 + z_2 \bar{c}_2 = Q$ ).

Note that  $\bar{P}$  is the differential diffusion permeability, while the experiment gives the integral diffusion permeability,  $P$ . It is possible to convert the concentration dependence of  $P(c)$  into  $\bar{P}(c)$  [4]:

$$\bar{P}(c) = P(c) + d \lg P / d \lg c \quad (S8)$$

and then calculate  $\bar{D}_1$  and  $\bar{D}_2$ .

The comparison of experimental and simulated concentration dependencies of  $\kappa$  and  $P$  is shown in Figure 5 (see the main text of the article). Since the value of  $\kappa$  is very close for the AMX in KCl and  $\text{NH}_4\text{Cl}$  solutions, the  $\text{Cl}^-$  diffusion coefficient,  $\bar{D}_1$ , in the membrane was taken the same for both cases,  $\bar{D}_{\text{Cl}^-} = 2.7 \times 10^{-11} \text{ m}^2/\text{s}$  (Table 1). Since in the solution the diffusion coefficients of  $\text{NH}_4^+$  and  $\text{Cl}^-$  are nearly identical, we assume the equality of these coefficients in the membrane:  $\bar{D}_{\text{K}^+} = \bar{D}_{\text{NH}_4^+} = 2.7 \times 10^{-11} \text{ m}^2/\text{s}$  (Table 1).

**The concentration of fixed groups in the pore solution** of the AMX membrane is calculated from the value of the exchange capacity of this membrane в  $\text{Cl}^-$  form by dividing the latter by the membrane porosity  $p=0.3$ ; the obtained value is  $Q = 7.6 \pm 1.0 \text{ mol/dm}^3 \text{ H}_2\text{O}$  [6], Table 1. The value of  $\varepsilon$  is taken as 80 in solution [7] and 30 in the membrane [8].

## References

1. L  v  que, A. Les Lois de La Transmission de Chaleur Par Convection. *Ann. des Mines* **1928**, *13*, 201–299.
2. Simons, R. Electric Field Effects on Proton Transfer between Ionizable Groups and Water in Ion Exchange Membranes. *Electrochim. Acta* **1984**, *29*, 151–158, doi:10.1016/0013-4686(84)87040-1.
3. Zabolotskii, V.I.; Shel'deshov, N.V.; Gnusin, N.P. Dissociation of Water Molecules in Systems with Ion-Exchange Membranes. *Russ. Chem. Rev.* **1988**, *57*, 801–808, doi:10.1070/RC1988v057n08ABEH003389.
4. Zabolotsky, V.I.; Nikonenko, V.V. Effect of Structural Membrane Inhomogeneity on Transport Properties. *J. Memb. Sci.* **1993**, *79*, 181–198, doi:10.1016/0376-7388(93)85115-D.
5. Nikonenko, V. V.; Yaroslavtsev, A.B.; Pourcelly, G. Ion Transfer in and Through Charged Membranes: Structure, Properties, and Theory. In *Ionic Interactions in Natural and Synthetic Macromolecules*; John Wiley & Sons, Inc.: Hoboken, NJ, USA, 2012; pp. 267–335 ISBN 9780470529270.
6. Sarapulova, V.; Shkorkina, I.; Mareev, S.; Pismenskaya, N.; Kononenko, N.; Larchet, C.; Dammak, L.; Nikonenko, V.; Sarapulova; Shkorkina; et al. Transport Characteristics of Fujifilm Ion-Exchange Membranes as Compared to Homogeneous Membranes AMX and CMX and to Heterogeneous Membranes MK-40 and MA-41. *Membranes (Basel)*. **2019**, *9*, doi:10.3390/membranes9070084.
7. Lide, D.R. *CRC Handbook of Chemistry and Physics Editor-in-Chief*; CRC Press LLC, **2005**;
8. Kamcev, J.; Paul, D.R.; Freeman, B.D. Ion Activity Coefficients in Ion Exchange Polymers: Applicability of Manning's Counterion Condensation Theory. *Macromolecules* **2015**, *48*, 8011–8024, doi:10.1021/acs.macromol.5b01654.
